# Supplementary material for: Multifunctional, superhydrophobic and highly elastic MXene/bacterial cellulose hybrid aerogels enabled via silylation
Source: Royal Society of Chemistry journal article supplement (doi:10.1039/d2ta06621a), 2022-01-01
Supplement: d2ta06621a1.pdf [file d2ta06621a1.pdf]

## Supplementary Information

### **Multifunctional, Superhydrophobic and Highly Elastic**

### **MXene/Bacterial Cellulose Hybrid Aerogels Enabled via Silylation**

*Daqiang Zhao<sup>1</sup>, Le-Yang Dang<sup>1</sup>, Gui-Gen Wang<sup>1,\*</sup>, Na Sun<sup>1</sup>, Xianyu Deng<sup>1</sup>, Jie-Cai Han<sup>3</sup>, Jia-Qi Zhu<sup>3,\*</sup>, Ya Yang<sup>2,\*</sup>*

<sup>1</sup> Shenzhen Key Laboratory for Advanced Materials, School of Materials Science and Engineering, Harbin Institute of Technology (Shenzhen), Shenzhen 518055, P. R. China.

<sup>2</sup> CAS Center for Excellence in Nanoscience, Beijing Key Laboratory of Micro-nano Energy and Sensor, Beijing Institute of Nanoenergy and Nanosystems, Chinese Academy of Sciences, Beijing 101400, P. R. China.

<sup>3</sup> National Key Laboratory of Science and Technology on Advanced Composites in Special Environments, Harbin Institute of Technology, Harbin 150080, P. R. China.

\*Corresponding Authors: G.-G. Wang ([wangguigen@hit.edu.cn](mailto:wangguigen@hit.edu.cn)), J.Q. Zhu ([zhujq@hit.edu.cn](mailto:zhujq@hit.edu.cn)), Y. Yang ([yayang@binn.cas.cn](mailto:yayang@binn.cas.cn))

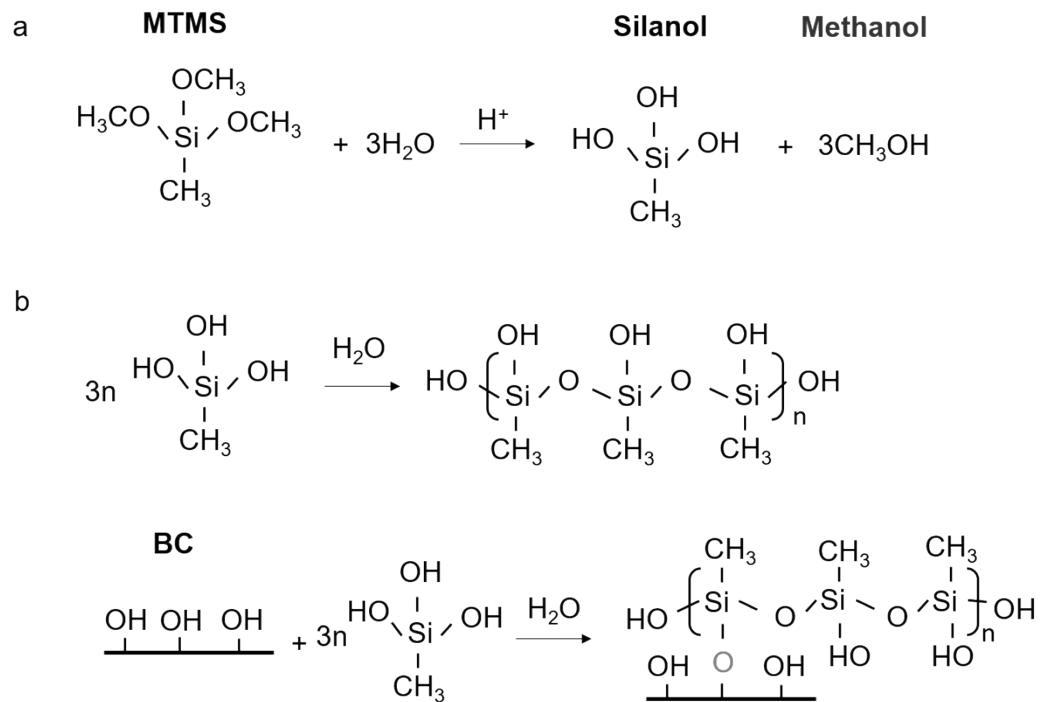

**Figure S1.** Schematic illustration of the reaction of MTMS in aqueous BC suspension.

(a) Chemical reaction between MTMS and H<sub>2</sub>O. (b) self-polymerization among unreacted silanols and *in situ* polymerization between unreacted silanols and hydroxyl groups.

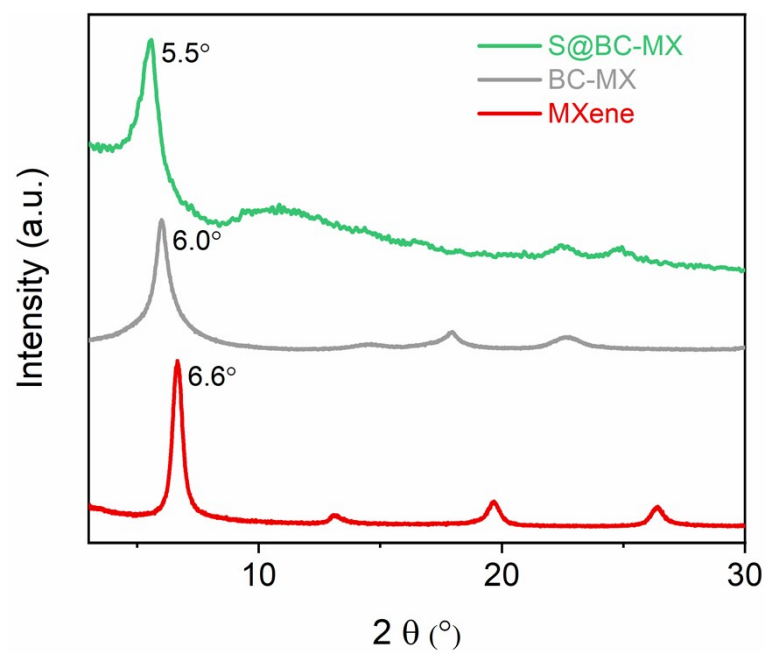

**Figure S2.** XRD patterns of pure MXene, BC-MX50%, and S@BC-MX50% aerogels.

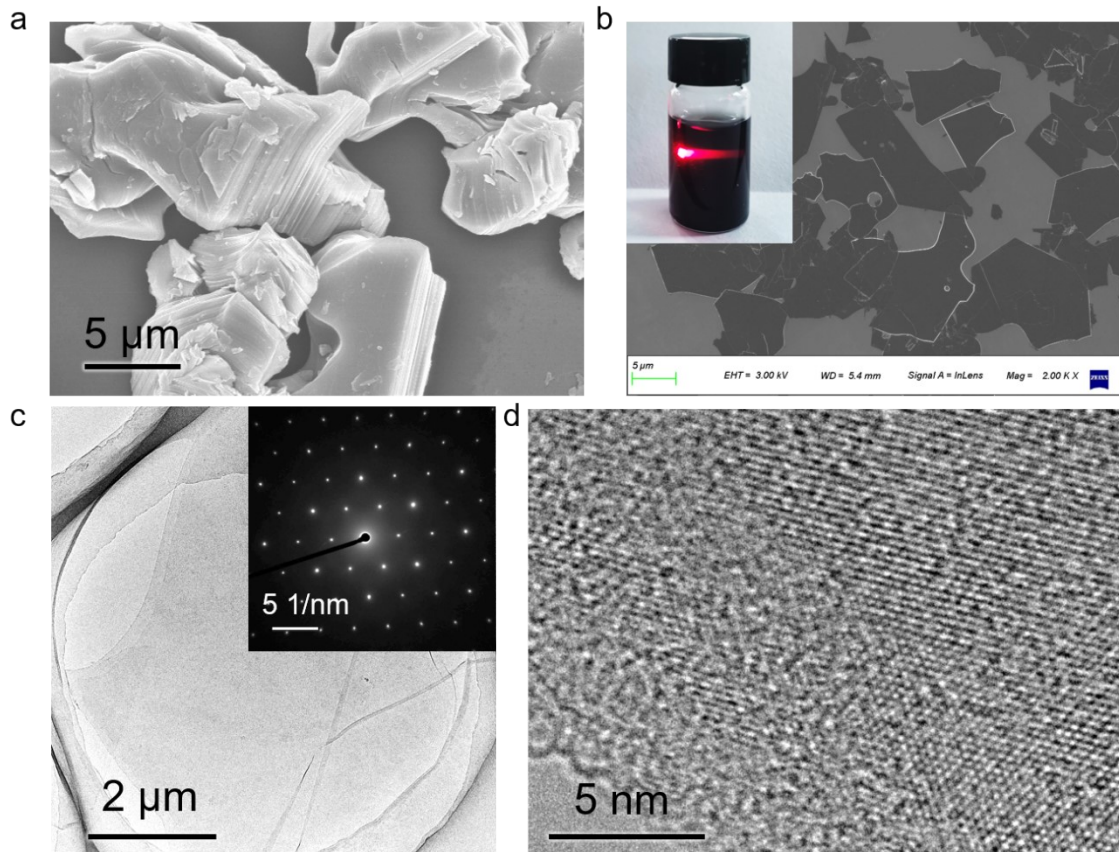

**Figure S3.** (a) SEM image of  $\text{Ti}_3\text{AlC}_2$  powder showing the compact layered structure. (b) SEM image of  $\text{Ti}_3\text{C}_2\text{T}_x$  nanosheets and inserted optical image of the MXene aqueous dispersion showing a typical Tyndall scattering effect. (c) TEM image and inserted electron diffraction of single-layer  $\text{Ti}_3\text{C}_2\text{T}_x$ . (d) HRTEM image of MXene nanosheets.

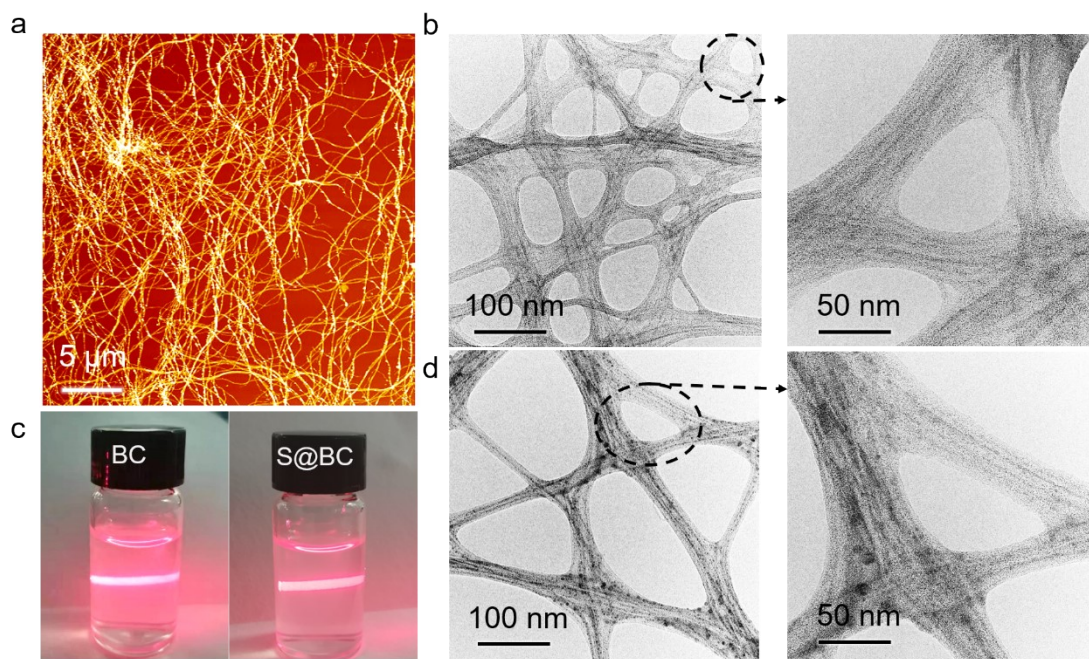

**Figure S4.** Morphologies of BC and Silyated BC. (a) AFM image of BC showing a quite high aspect ratio. (b) TEM images of BC networks. (c) Stable colloidal suspension of BC and silylated BC. (d) TEM images of silylated BC networks.

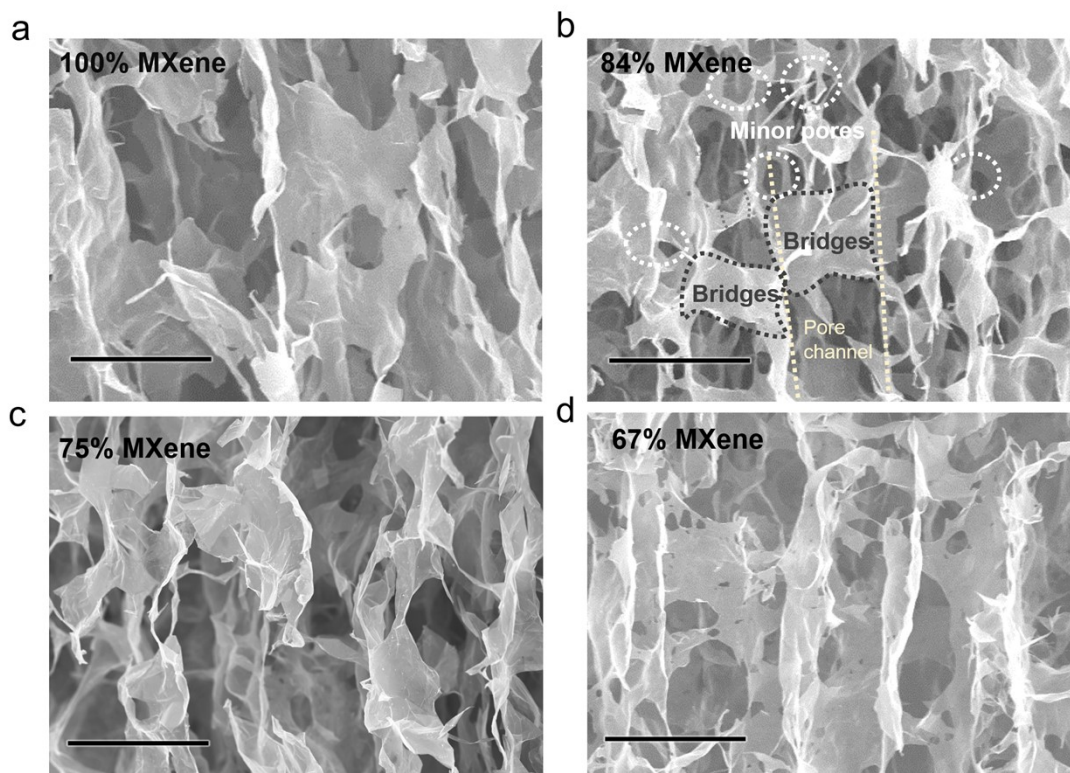

**Figure S5.** Cross-sectional SEM images of (a) pure MXene aerogel and (b-d) S@BC-MX84%, S@BC-MX75%, and S@BC-MX67% aerogels. Scale bar is 50  $\mu\text{m}$  and applies to all images.



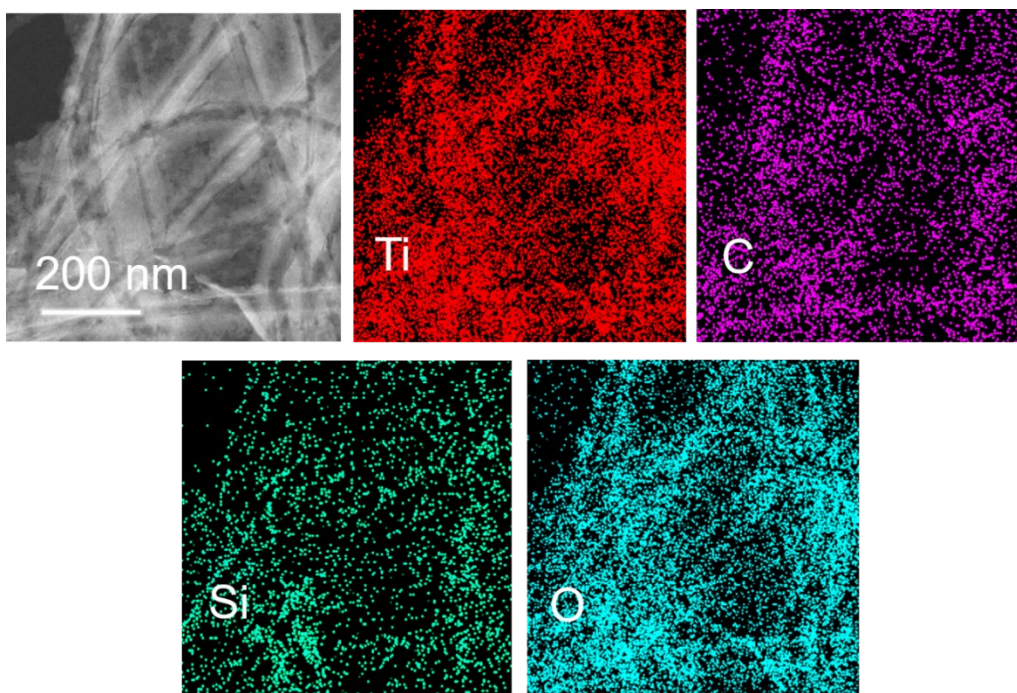

**Figure S6.** HADF-STEM image of S@BC-MX50% aerogel and corresponding EDS mapping images of Ti, C, Si, and O.

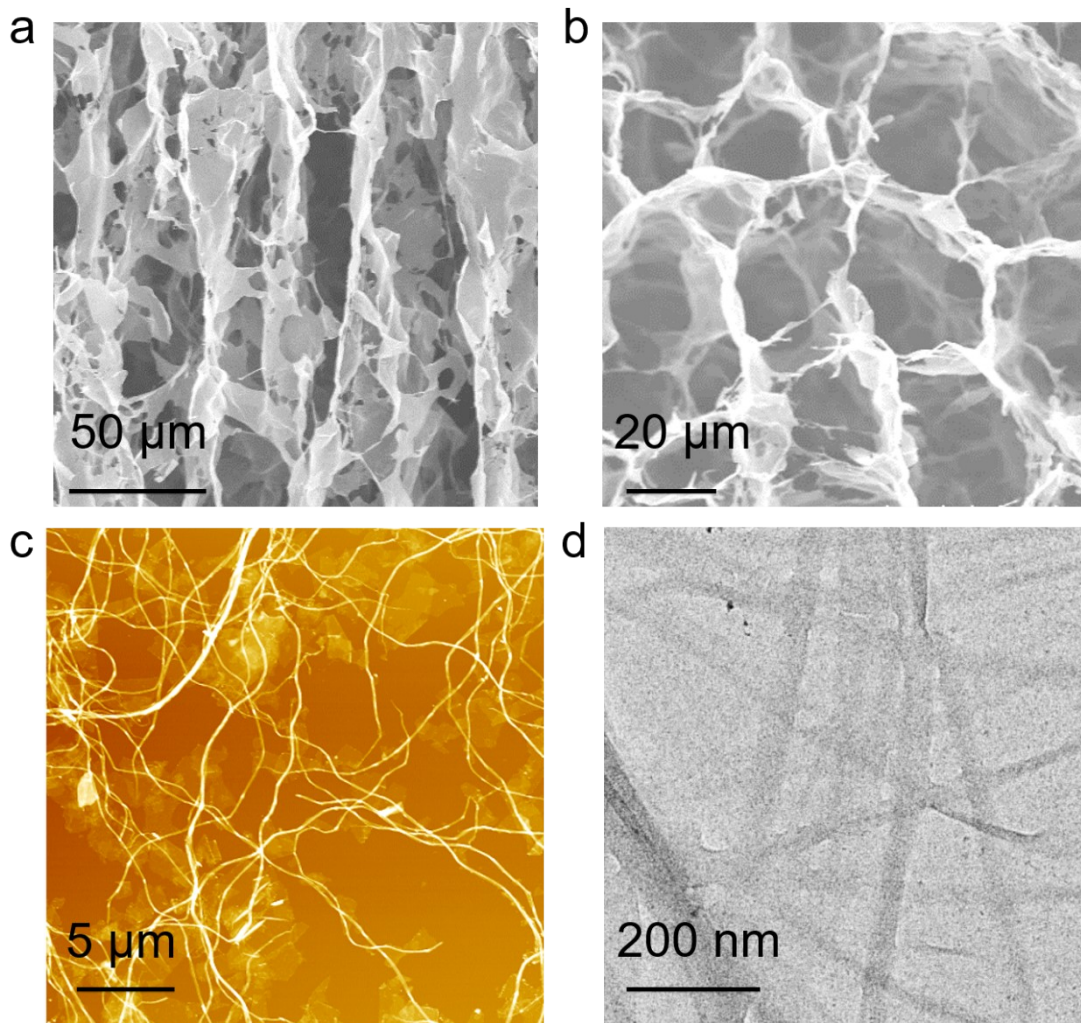

**Figure S7** Morphologies of BC-MX50% hybrid aerogel. (a) cross-sectional SEM image. (b) Top-view SEM image. (c) AFM image of MXene nanosheets assembled with BC nanofibers. (d) TEM image of cell wall.



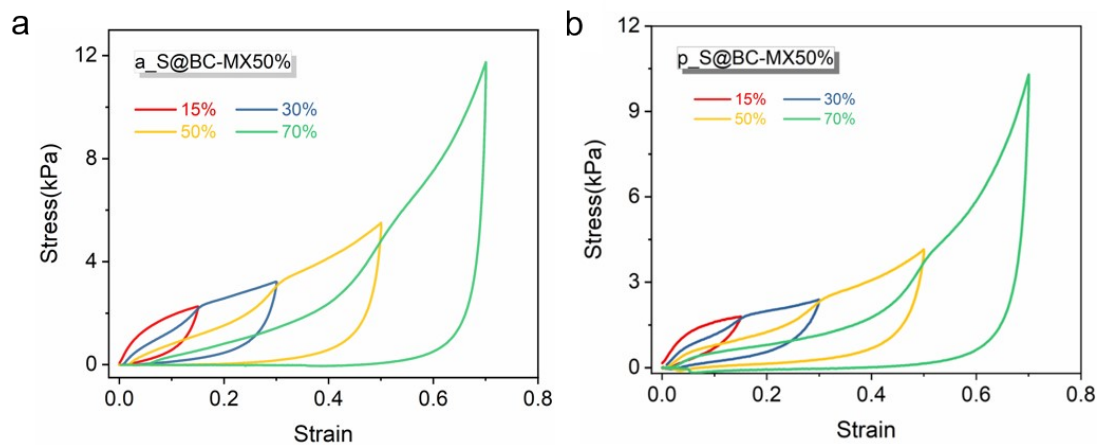

**Figure S8.** Stress-strain curves of S@BC-MX50% aerogel compressed along (a) “a” and (b) “p\_” directions.

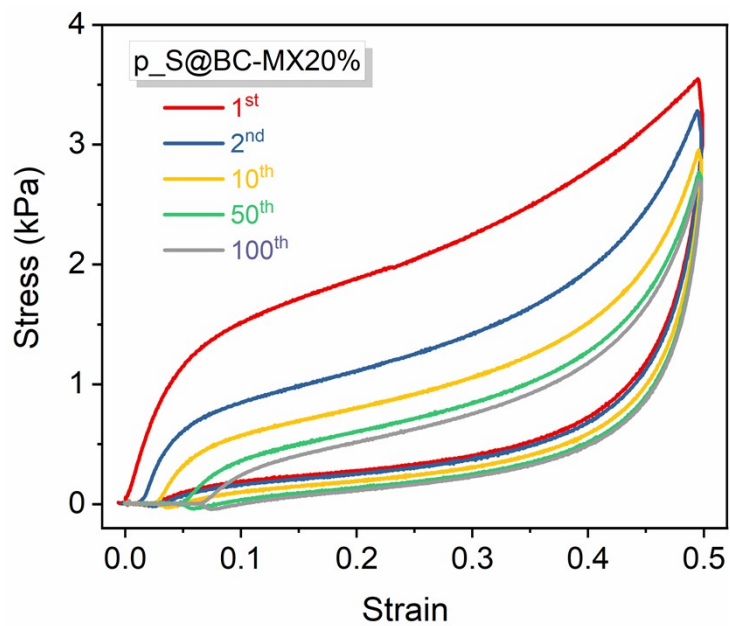

**Figure S9.** Stress-strain curves of S@BC-MX20% aerogel along “p\_” direction at 50% strain for 100 cycles.

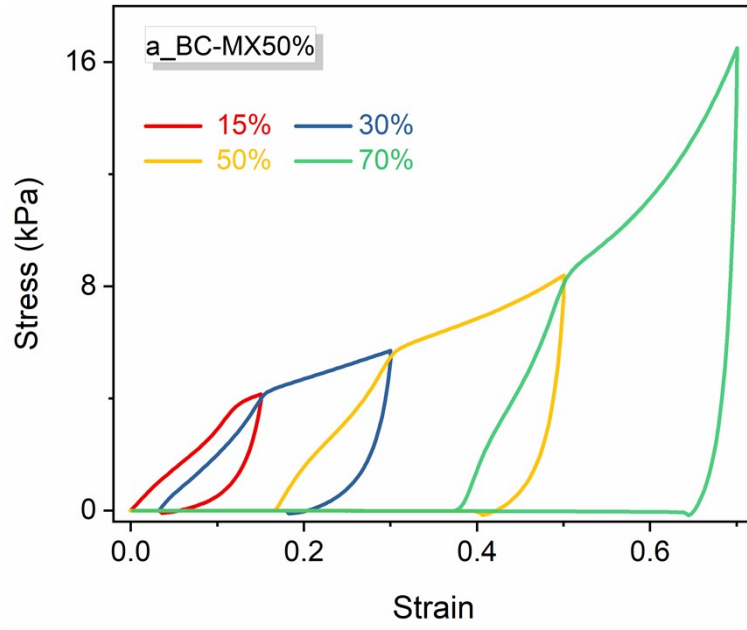

**Figure S10.** Stress-strain curves of unmodified BC-MX50% aerogel compressed at “a\_” direction.

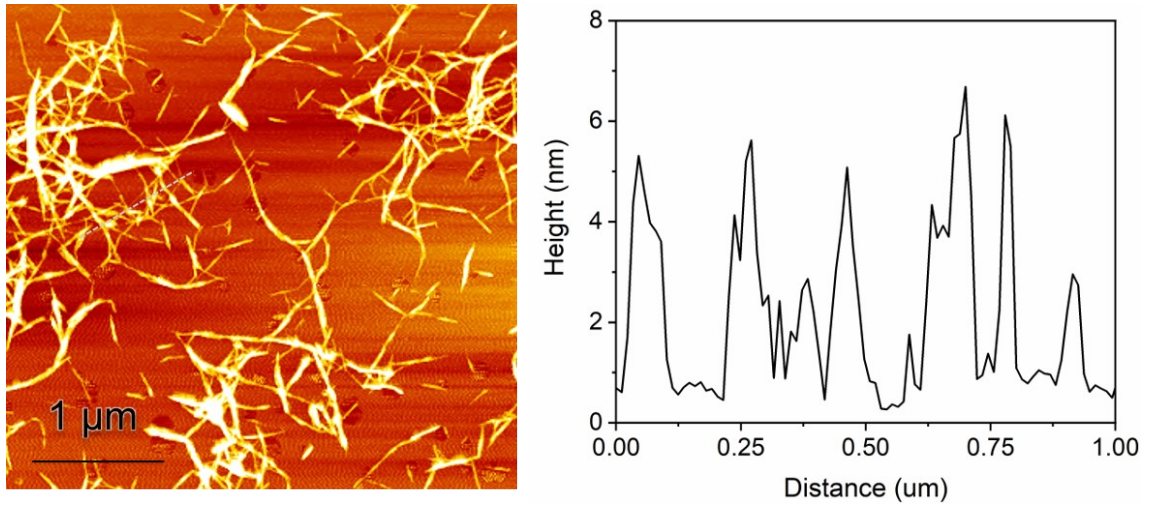

**Figure S11.** AFM image and height profile of CNF.

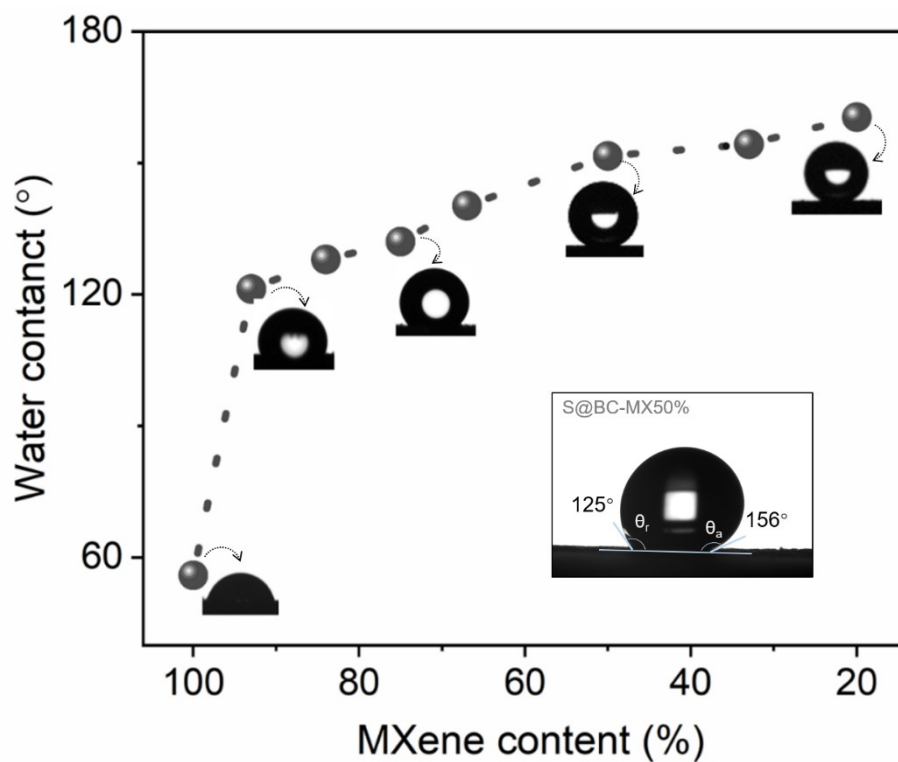

**Figure S12.** Water contact angle of S@BC-MX aerogels with different MXene contents, with the bottom right inset showing the advancing and receding contact angles of S@BC-MX50% aerogel measured by tilted plate experiments.



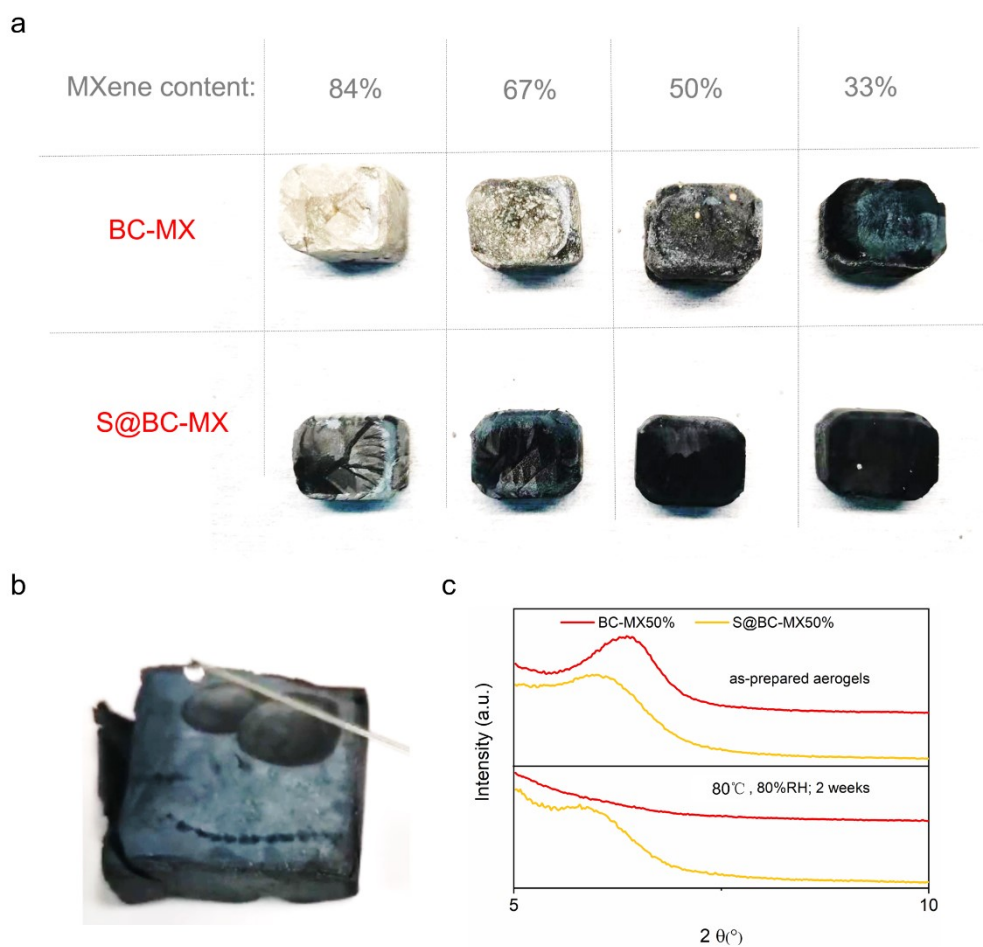

**Figure S13.** (a) The real-object pictures of BC-MX aerogels and S@BC-MX aerogels after being exposed to humid air for 2 weeks at 80°C under a constant relative humidity of 80%. (b) The structural collapse of unmodified BC-MX50% aerogel touched with water droplets. (c) XRD patterns of BC-MX50% aerogels and S@BC-MX50% aerogels before and after aging tests in humid air.

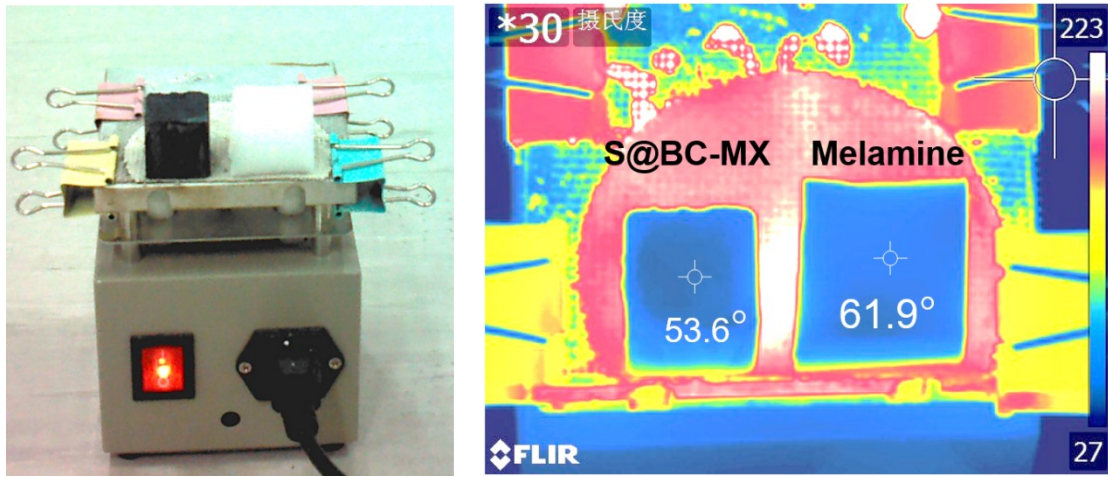

**Figure S14.** Physical and thermographic images of S@BC-MX50% aerogel and melamine foam (density:  $9.1\text{mg}/\text{cm}^3$ , thickness: 25mm) on a heating plate of  $\sim 235\text{ }^\circ\text{C}$ .

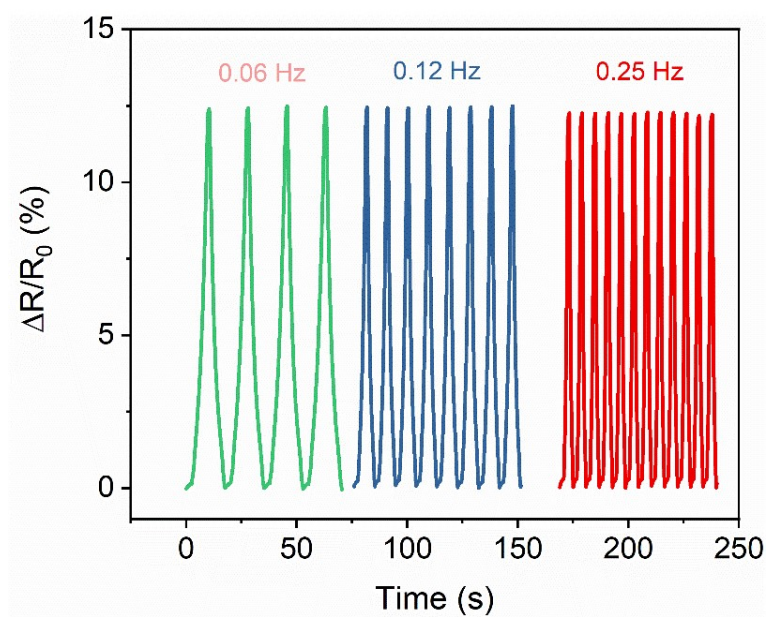

**Figure S15.** Normalized resistance changes of the S@BC-MX67% aerogel at 30% strain with different deformation frequencies.

**Table S1.** Comparison of hydrophobicity, electrical conductivity and compression property of nanocellulose- and MXene- based elastic aerogel materials.

| Materials              | Density<br>(mg/cm <sup>3</sup> ) | Water<br>contact<br>angle<br>(°) | Electrical<br>conductivity<br>(S/m) | Compression properties |            |                            |                            | Ref.                 |
|------------------------|----------------------------------|----------------------------------|-------------------------------------|------------------------|------------|----------------------------|----------------------------|----------------------|
|                        |                                  |                                  |                                     | Strain<br>(%)          | Cycle      | Height<br>retention<br>(%) | Stress<br>retention<br>(%) |                      |
| <b>S@BC-<br/>MX50%</b> | <b>6.2</b>                       | <b>152</b>                       | <b>7</b>                            | <b>50</b>              | <b>500</b> | <b>85</b>                  | <b>60</b>                  | <b>This<br/>work</b> |
| <b>S@BC-<br/>MX84%</b> | <b>6.2</b>                       | <b>128</b>                       | <b>118</b>                          | <b>50</b>              | <b>100</b> | <b>87.5</b>                | <b>61</b>                  |                      |
| Pure MXene             | 11.0                             | Hydrophilic                      | -                                   | 50                     | 20         | 84                         | 95                         | 1                    |
| Silylated CNF          | 17.3                             | 138                              | Insulating                          | 50                     | 1          | 96                         | -                          | 2                    |
| Silylated<br>PVA/CNF   | 10.2                             | 142                              | Insulating                          | 70                     | 100        | 82                         | 86                         | 3                    |
| MXene/CNF/<br>PU       | -                                | 152                              | -                                   | 40                     | 100        | 82                         | 76                         | 4                    |
| MXene/ANF              | 25.0                             | Hydrophilic                      | -                                   | 30                     | 1000       | 96                         | 92                         | 5                    |
| MXene/CNT              | 9.1                              | Hydrophilic                      | 447                                 | 50                     | 100        | 93                         | 79                         | 6                    |
| Carbonized<br>BC/MXene | 26.2                             | Hydrophobic                      | 0.013                               | 50                     | 5000       | 98                         | 91                         | 7                    |
| MXene/GO               | 12.2                             | 99                               | 31.6                                | 50                     | 100        | 99                         | 93                         | 8                    |
| MXene/PI               | 13.8                             | -                                | 0.4                                 | 50                     | 1000       | 86                         | 90                         | 9                    |

**Table S2.** Elemental content of S@BC-MX aerogels with different concentrations of MXene.

| MXene content | Ti (at%) | C (at%) | Si (at%) | O (at%) | F (at%) | Cl (at%) |
|---------------|----------|---------|----------|---------|---------|----------|
| 100%          | 38.1     | 28.0    | -        | 21.2    | 11.5    | 1.2      |
| 93%           | 27.6     | 31.7    | 1.0      | 26.4    | 11.5    | 1.8      |
| 84%           | 25.1     | 27.5    | 2.1      | 34.1    | 9.3     | 1.9      |
| 75%           | 17.6     | 38.6    | 2.8      | 34.1    | 5.4     | 1.5      |
| 67%           | 14.5     | 39.9    | 3.8      | 34.4    | 5.9     | 1.5      |
| 50%           | 9.1      | 37.0    | 5.1      | 41.2    | 6.7     | 0.9      |
| 33%           | 5.0      | 42.0    | 9.0      | 39.7    | 3.7     | 0.6      |



**Table S3.** Comparison of the absorbent capacity of various hydrophobic aerogel materials towards organic solvents and oils.

| Absorbent materials                              | Density (mg/cm <sup>3</sup> ) | Water contact angle | Absorbent capacity (g/g) | Ref.             |
|--------------------------------------------------|-------------------------------|---------------------|--------------------------|------------------|
| <b>Silylated BC/MXene</b>                        | <b>6.2</b>                    | <b>152</b>          | <b>88-210</b>            | <b>This work</b> |
| Silyated cellulose                               | 2.9-16.6                      | 142                 | 51-143                   | 10               |
| Methyltrichlorosilane modified PVA-CNF           | 13                            | 150                 | 44-96                    | 11               |
| Trimethylsilylation modified bacterial cellulose | 6.7                           | 147                 | 80-185                   | 12               |
| Carbonaceous fiber from raw cotton               | 12                            | 120                 | 55-183                   | 13               |
| Carbonaceous fiber from bacterial cellulose      | 4-6                           | 129                 | 106-321                  | 14               |
| CNT                                              | 5-10                          | 156                 | 87-176                   | 15               |
| Graphene-CNT                                     | 2.1-4.3                       | 92-140              | 125-533                  | 16               |
| GO                                               | 4.4-7.9                       | 155                 | 100-250                  | 17               |
| APTES-modified GO-GO nanoribbon                  | 2.3-4.1                       | 142                 | 98-447                   | 18               |
| GO-GO nanoribbon                                 | 2.2-6.8                       | -                   | 100-350                  | 19               |

**Table S4.** Electrical conductivities of S@BC-MX aerogels and BC-MX aerogels with various MXene contents at the density of 6.2 mg/cm<sup>3</sup>.

| MXene content (wt%) | Electrical conductivity of S@BC-MX aerogels (S/m) | Electrical conductivities of BC-MX aerogels(S/m) |
|---------------------|---------------------------------------------------|--------------------------------------------------|
| 100                 | 163                                               | 163                                              |
| 93                  | 132.1                                             | 118.5                                            |
| 84                  | 117.6                                             | 108.4                                            |
| 75                  | 61.6                                              | 48.8                                             |
| 67                  | 38.9                                              | 33.7                                             |
| 50                  | 7.8                                               | 7.0                                              |
| 33                  | 0.07                                              | 1.3                                              |

## References

1. M. Han, X. Yin, K. Hantanasirisakul, X. Li, A. Iqbal, C. B. Hatter, B. Anasori, C. M. Koo, T. Torita and Y. Soda, *Advanced Optical Materials*, 2019, **7**, 1900267.
2. Z. Zhang, G. Sèbe, D. Rentsch, T. Zimmermann and P. Tingaut, *Chemistry of Materials*, 2014, **26**, 2659-2668.
3. X. Zhang, H. Wang, Z. Cai, N. Yan, M. Liu and Y. Yu, *ACS Sustainable Chemistry & Engineering*, 2018, **7**, 332-340.
4. C. Cai, Z. Wei, Y. Huang and Y. Fu, *Chemical Engineering Journal*, 2021, **421**, 127772.
5. L. Wang, M. Zhang, B. Yang, J. Tan and X. Ding, *ACS Nano*, 2020, **14**, 10633-10647.
6. Z. Deng, P. Tang, X. Wu, H.-B. Zhang and Z.-Z. Yu, *ACS Applied Materials & Interfaces*, 2021, **13**, 20539-20547.
7. Z. Chen, Y. Hu, H. Zhuo, L. Liu, S. Jing, L. Zhong, X. Peng and R.-c. Sun, *Chemistry of Materials*, 2019, **31**, 3301-3312.
8. D. Jiang, J. Zhang, S. Qin, Z. Wang, K. A. S. Usman, D. Hegh, J. Liu, W. Lei and J. M. Razal, *ACS Nano*, 2021, **15**, 5000-5010.
9. J. Liu, H. B. Zhang, X. Xie, R. Yang, Z. Liu, Y. Liu and Z. Z. Yu, *Small*, 2018, **14**, 1802479.
10. O. Laitinen, T. Suopajärvi, M. Österberg and H. Liimatainen, *ACS applied materials & interfaces*, 2017, **9**, 25029-25037.
11. Q. Zheng, Z. Cai and S. Gong, *Journal of materials chemistry A*, 2014, **2**, 3110-3118.
12. H. Sai, R. Fu, L. Xing, J. Xiang, Z. Li, F. Li and T. Zhang, *ACS applied materials & interfaces*, 2015, **7**, 7373-7381.
13. H. Bi, Z. Yin, X. Cao, X. Xie, C. Tan, X. Huang, B. Chen, F. Chen, Q. Yang and X. Bu, *Advanced Materials*, 2013, **25**, 5916-5921.

14. Z. Y. Wu, C. Li, H. W. Liang, J. F. Chen and S. H. Yu, *Angewandte Chemie*, 2013, 125, 2997-3001.
15. X. Gui, J. Wei, K. Wang, A. Cao, H. Zhu, Y. Jia, Q. Shu and D. Wu, *Advanced materials*, 2010, 22, 617-621.
16. W. Zhan, S. Yu, L. Gao, F. Wang, X. Fu, G. Sui and X. Yang, *ACS applied materials & interfaces*, 2018, 10, 1093-1103.
17. J. Li, J. Li, H. Meng, S. Xie, B. Zhang, L. Li, H. Ma, J. Zhang and M. Yu, *Journal of Materials Chemistry A*, 2014, 2, 2934-2941.
18. S. Hou, X. Wu, Y. Lv, W. Jia, J. Guo, L. Wang, F. Tong and D. Jia, *Applied Surface Science*, 2020, 509, 144818.
19. C. Wang, X. He, Y. Shang, Q. Peng, Y. Qin, E. Shi, Y. Yang, S. Wu, W. Xu and S. Du, *Journal of Materials Chemistry A*, 2014, 2, 14994-15000.
